# Supplementary material for: Synthetic m3G-CAP attachment necessitates a minimum trinucleotide constituent to be recognised as a nuclear import signal
Source: Royal Society of Chemistry journal article supplement (doi:10.1039/c6ra09568b), 2016-01-01
Supplement: c6ra09568b1.pdf [file c6ra09568b1.pdf]

## Supplementary information

to

Synthetic m<sub>3</sub>G-CAP attachment necessitates a minimum trinucleotide constituent  
to be recognized as Nuclear Import Signals.

M. Honcharenko,<sup>\*a#</sup> B. Bestas,<sup>b#</sup> M. Jezowska,<sup>a#</sup> B. A. Wojtczak,<sup>c</sup> P. Moreno,<sup>b</sup> J. Romanowska,<sup>a</sup> S. M.  
Bächle,<sup>d</sup> E. Darzynkiewicz,<sup>ce</sup> J. Jemielity,<sup>c</sup> C. I. E. Smith,<sup>b</sup> and R. Strömberg<sup>a\*</sup>

|                                                                                                                                                                                                                        |      |
|------------------------------------------------------------------------------------------------------------------------------------------------------------------------------------------------------------------------|------|
| <b>S1.</b> Synthesis of PEG Biotin Linker.....                                                                                                                                                                         | p 2  |
| <b>S2.</b> Synthesis of 5'-pCH <sub>2</sub> p-A <sub>(OMe)</sub> U <sub>(OMe)</sub> A-linker-N <sub>3</sub> and m <sub>3</sub> GppCH <sub>2</sub> pA <sub>(OMe)</sub> U <sub>(OMe)</sub> A-linker-N <sub>3</sub> ..... | p 2  |
| <b>S3.</b> Mass Spectra of Biotin linkers.....                                                                                                                                                                         | p 5  |
| <b>S4.</b> Mass Spectra of purified m <sub>3</sub> G-cap constructs.....                                                                                                                                               | p 6  |
| <b>S5.</b> Fluorescence spectroscopy images of cells treated with m <sub>3</sub> G-CAP biotin construct complexes with STV-Alexa488 that did not display nuclear uptake.....                                           | p 13 |
| <b>S6.</b> Enlargements of fluorescence spectroscopy images of U2OS cells transfected with STV-Alexa488 complexes of constructs <b>22</b> and <b>23</b> .....                                                          | p 14 |
| <b>S7.</b> Histogram of fluorescent signal intensities across cells transfected with STV-Alexa488 complex of construct <b>23</b> .....                                                                                 | p 15 |

## S1. Synthesis of PEG Biotin Linker (13)

The reaction flask was charged with (4-(propionylamidomethyl)benzoic acid) PATA (5 eq., 0.075 mmol, 15 mg) and HBTU (5 eq., 0.075 mmol, 28 mg), evacuated on a pump and then flushed with N<sub>2</sub>. The solid substrates were dissolved in DMF (1 mL) and NMM (25 eq., 0.375 mmol, 41 μL) was added with a syringe. The reaction mixture was allowed to stir for 30 min. Biotin-PEG(23)-NH<sub>2</sub> (1 eq, 0.015 mmol, 20 mg) was then added and the solution was stirred for an additional 3 h. After this time MS analysis showed completion of reaction and the mixture was concentrated to dryness. The crude product was purified by RP-HPLC using a linear gradient of buffer B in A from 0%–60% in 20 min, detector at 220nm, t<sub>R</sub> = 15.0, ES-MS, calcd (M+H) 1484.8, found 1484.0

## S2. Synthesis of 5'-pCH<sub>2</sub>pA<sub>(OMe)</sub>U<sub>(OMe)</sub>A-linker-N<sub>3</sub>.

Trinucleotide 5'-HO-A<sub>(OMe)</sub>U<sub>(OMe)</sub>A-linker-N<sub>3</sub> (50mg, 0.035 mmol) [Honcharenko et al., RSC Advances, 2012, 2, 12949–12962] was dissolved in anhydrous trimethyl phosphate (700 μL) and the reaction flask was placed on an ice-bath. Then, tetrachloromethylene(bisphosphonate) was added (26 mg, 0.1 mmol, 3 eq) and the mixture was stirred at 0 °C until the disappearance of the starting material as determined by TLC (iPrOH/NH<sub>3aq</sub>/H<sub>2</sub>O, 7:2:1). Usually, after 1.5-2h, the solvent was evaporated under vacuum and to the glassy remaining, NH<sub>3aq</sub> was added (1 mL) and stirred for additional 4 h at room temperature. Then, the reaction mixture was neutralized with 1M NaHCO<sub>3aq</sub>, and lyophilized. The crude product was purified by DEAE-Sephadex and isolated as TEA salts. Yield: (285 mOD).

## Synthesis of m<sub>3</sub>GppCH<sub>2</sub>pA<sub>(OMe)</sub>U<sub>(OMe)</sub>A-linker-N<sub>3</sub>.

5'-methylene(bis)phosphonylated trinucleotide 5'-pCH<sub>2</sub>pA<sub>(OMe)</sub>U<sub>(OMe)</sub>A-linker-N<sub>3</sub> (100 mOD, 0.0025 mmol) was dissolved in morpholine buffer (1.25 mL, pH 7). Then, m<sub>3</sub>GMP-Im (11.2 mg, 0.025 mmol, 10 eq) and MnCl<sub>2</sub> x 4H<sub>2</sub>O (5 mg, 0.025 mmol, 10 eq) were added and the reaction mixture was left stirred at 30 °C until the disappearance of the starting material as determined by RP-HPLC. Then, the reaction was stopped by addition of a solution of EDTA in water (0.5 mL) and neutralized with 1 M NaHCO<sub>3</sub>. The crude product was purified by preparative RP-HPLC and isolated as NH<sub>4</sub><sup>+</sup> salts. Yield: (15 mOD)

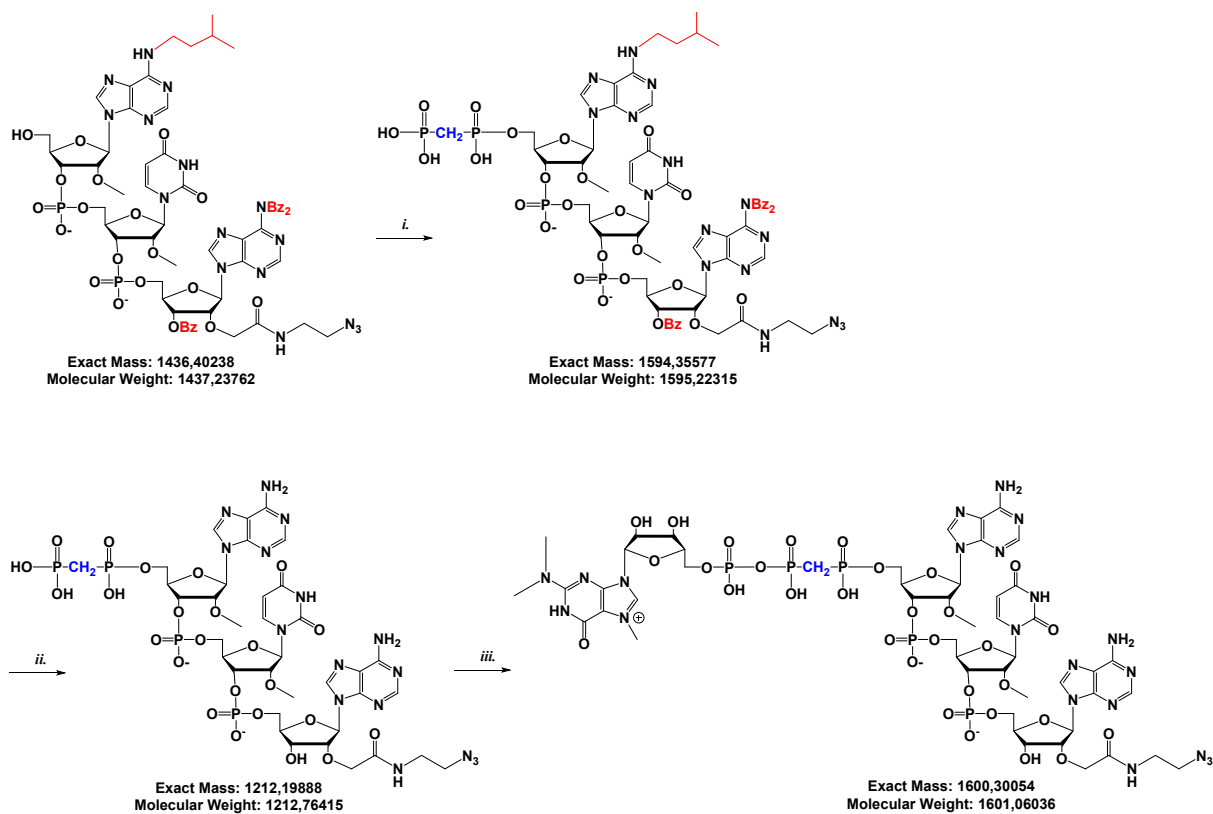

**Fig. 1.** i.  $(\text{POCl}_2)_2\text{CH}_2$ ,  $\text{P}(\text{O})(\text{OMe})_3$ , ii.  $\text{NH}_3\text{aq}$ , rt;  $m_3\text{GMP-Im}$ ,  $\text{MnCl}_2$ , morpholine buffer pH 7

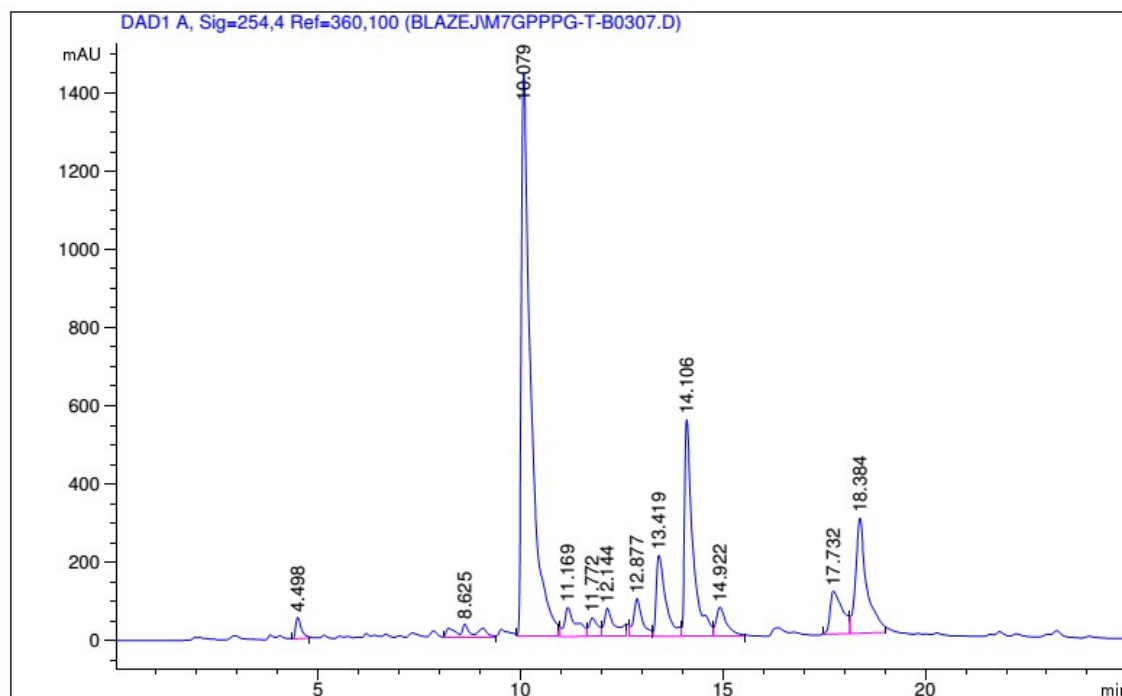

**Fig. 2** RP-HPLC profile of the reaction mixture. 18.38 min ( $m_3\text{GpCH}_2\text{pp-A}_2'\text{OMeU}_2'\text{OMeA-linker-N}_3$ , MW 1601), 14.106 min ( $m_3\text{GMP-Im}$ ), 10.079 min ( $m_3\text{GMP}$ ).

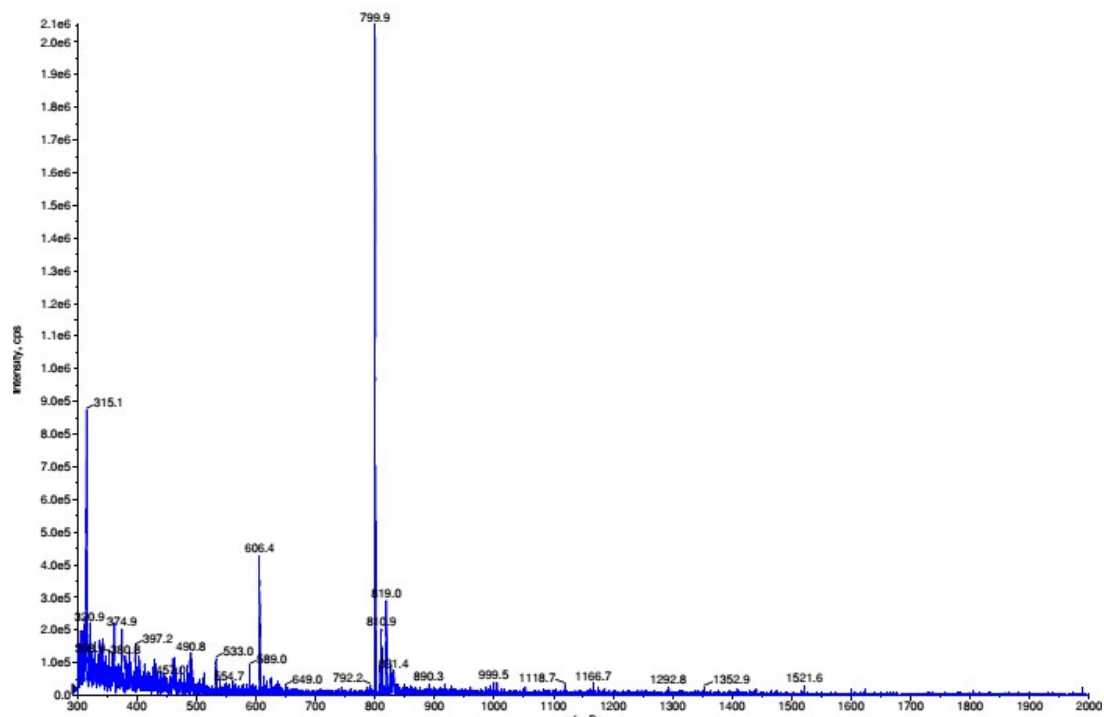

**Fig. 3** ESI MS spectrum (negative mode) of the product  $m_3\text{GpCH}_2\text{pp-A}_2'\text{OMeU}_2'\text{OMeA-linker-N}_3$ , MW 1601

### S3. Mass Spectra of Biotin linkers.

#### Short Biotin Linker (SBL)

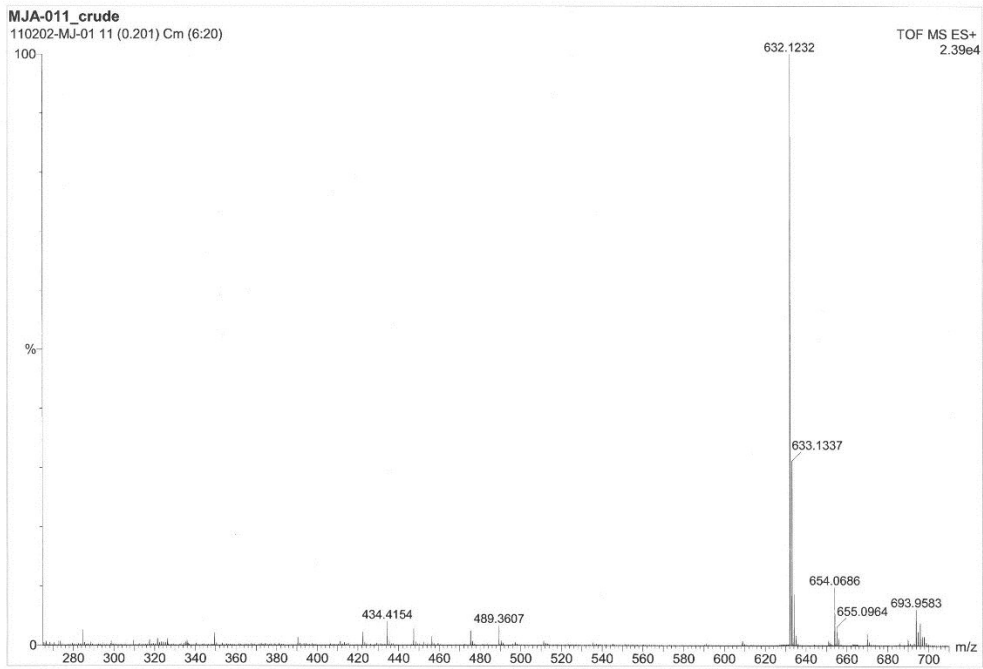

#### Long Biotin Linker (LBL)

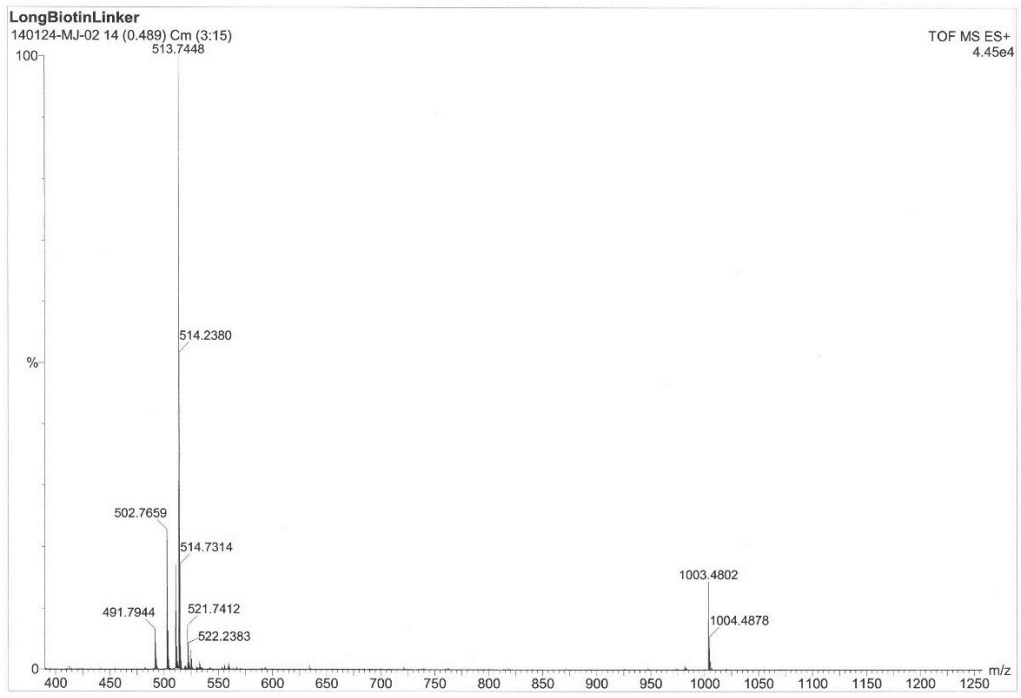

PEG Biotin Linker (PEGBL)

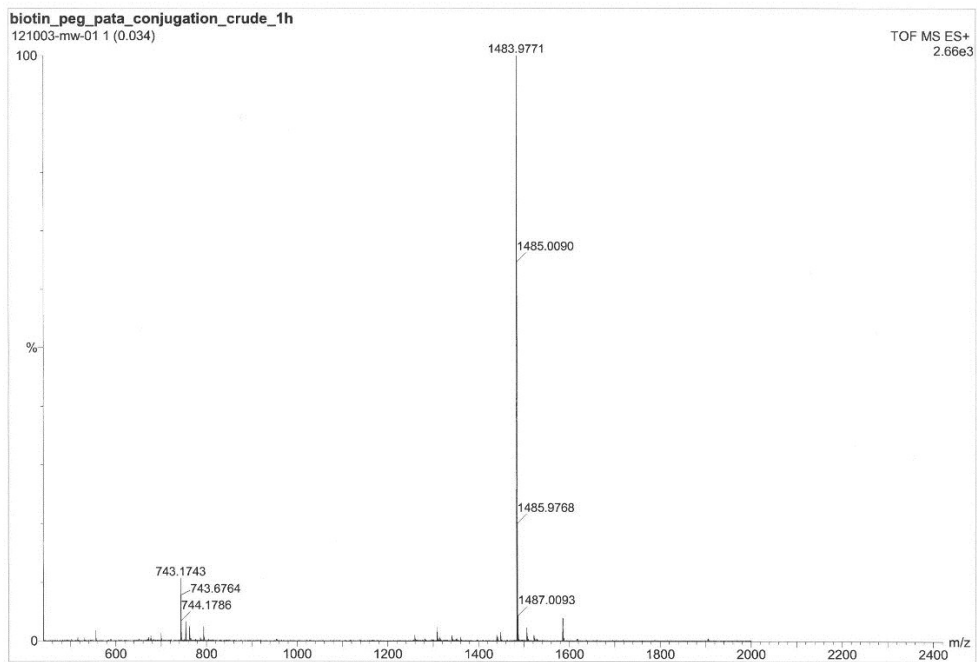

#### S4. Mass Spectra of purified $m_3G$ -cap analogues.

##### a. Compound 14: $m_3GpppA$ -aza-LBL

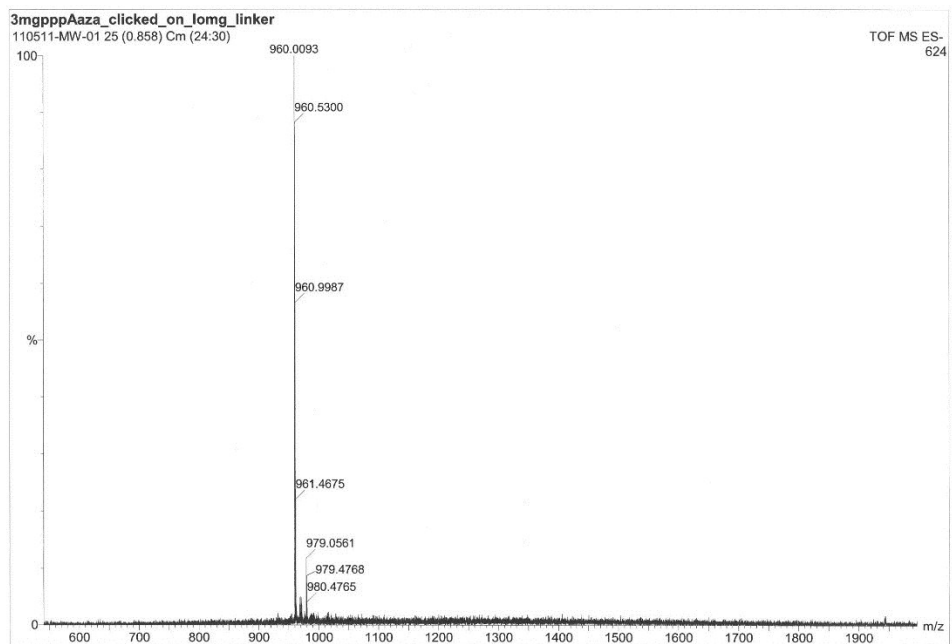

**b. Compound 15:  $m_3$ GpppAOMe-aza-LBL**



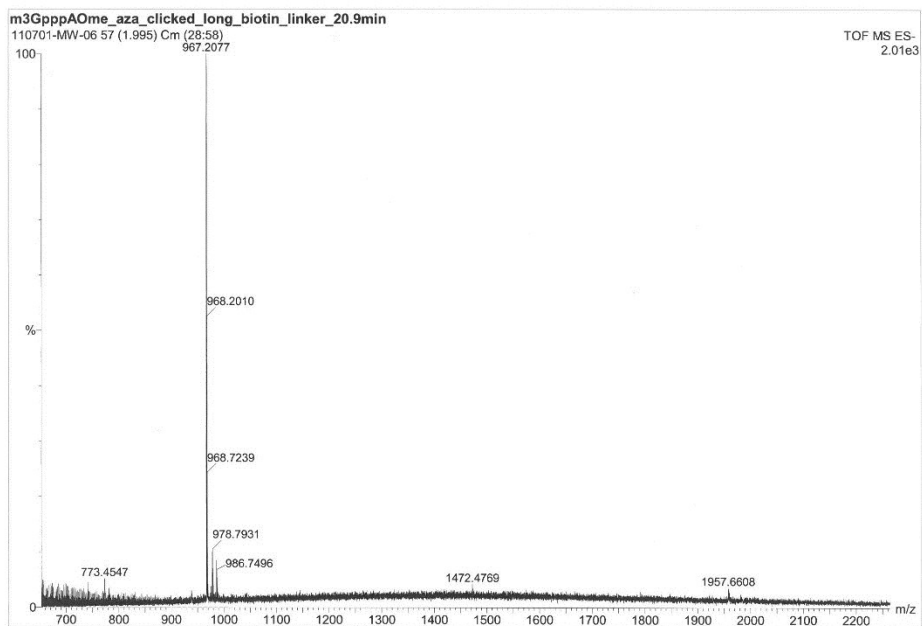

**c. Compound 16: m<sub>3</sub>GpppAOMe-phos-aza-LBL**

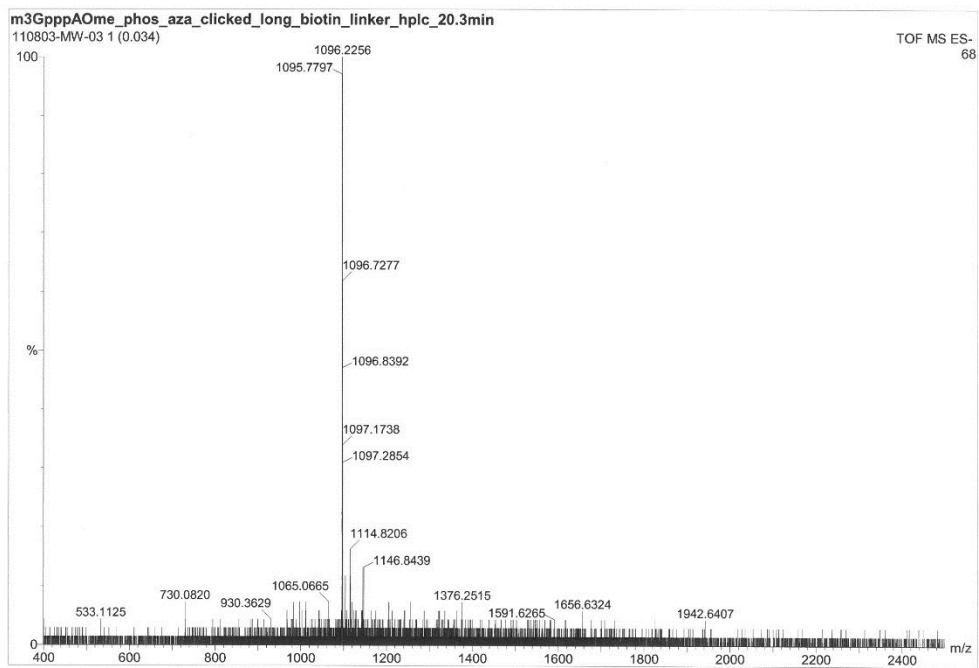

**d. Compound 17: m<sub>3</sub>GpppAOMe-phos-aza-SBL**

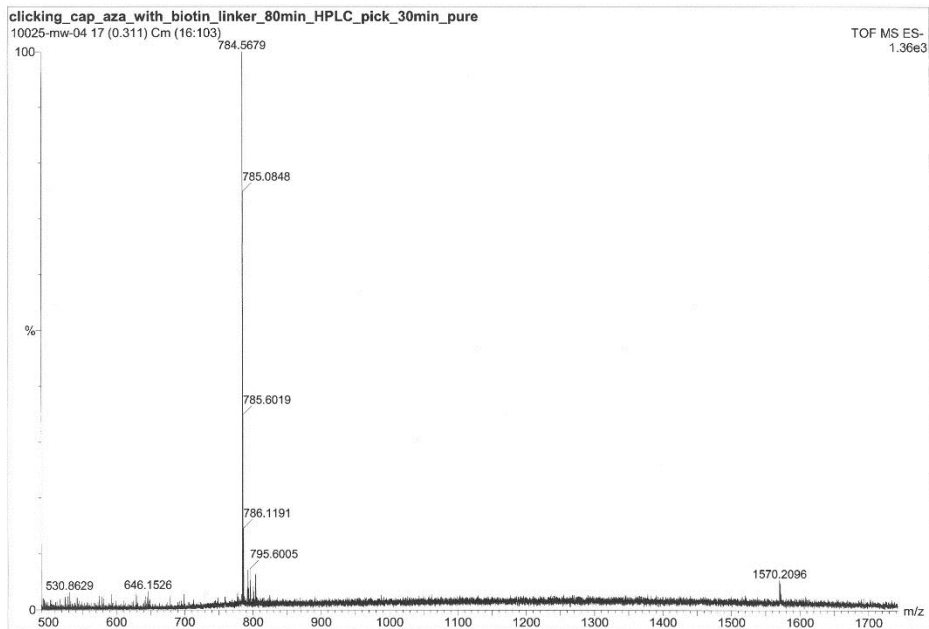

e. **Compound 18:**  $m_3\text{GppCH}_2\text{pA-aza-LBL}$

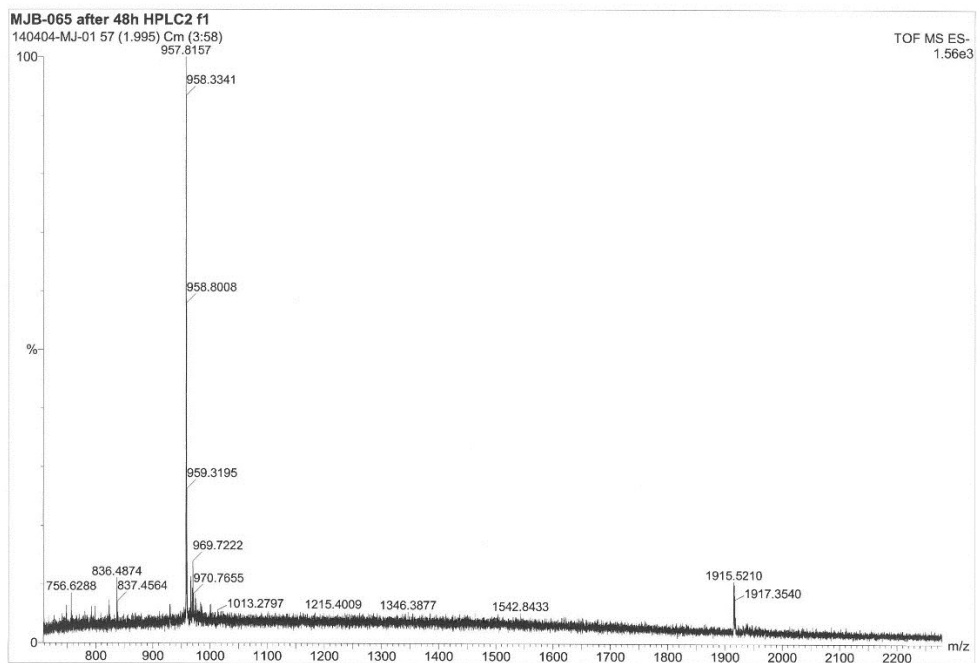

f. **Compound 19:**  $m_3GpCH_2ppA$ -aza-LBL

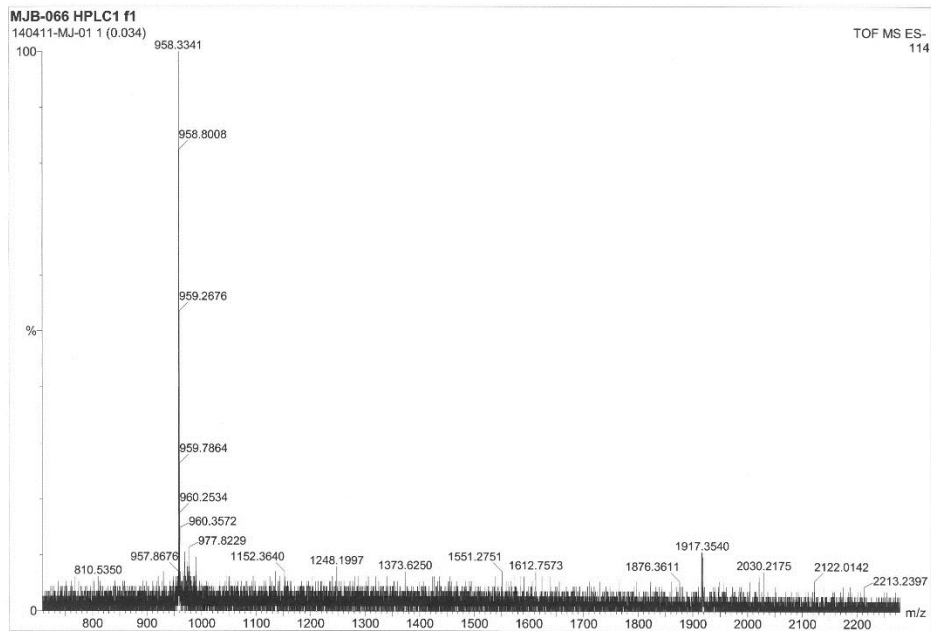

**g. Compound 20:**  $m_3$ GppNHpA-aza-LBL

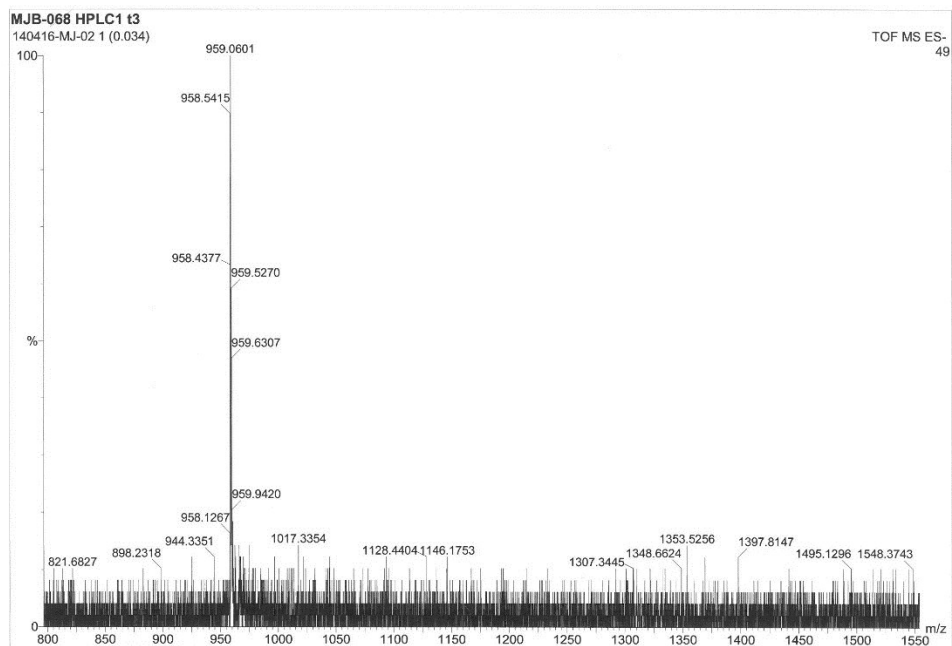

**h. Compound 21:  $m_3$ GpNHppA-aza-LBL**

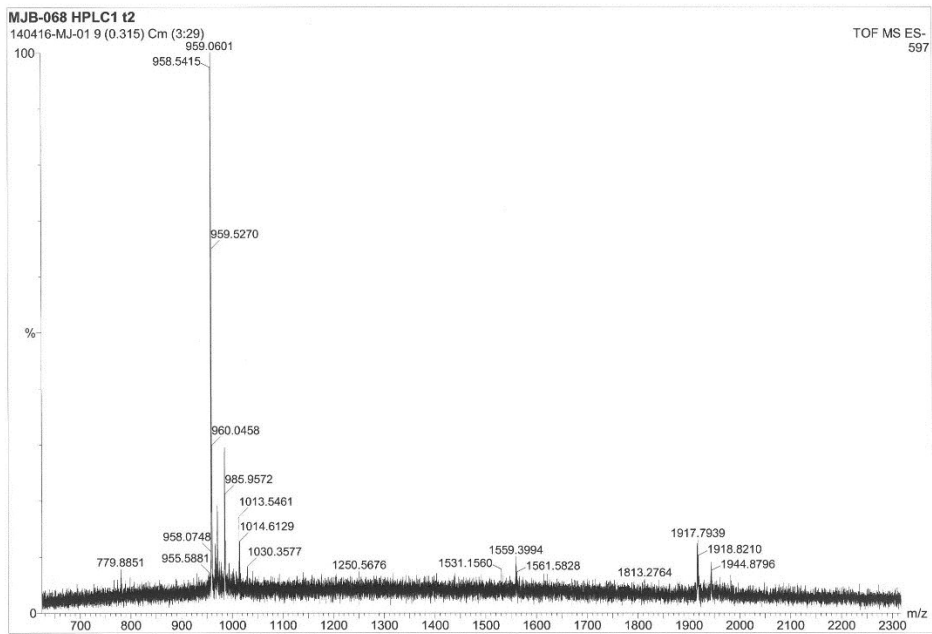

i. **Compound 22:** pAOMeUOMeA-aza-LBL

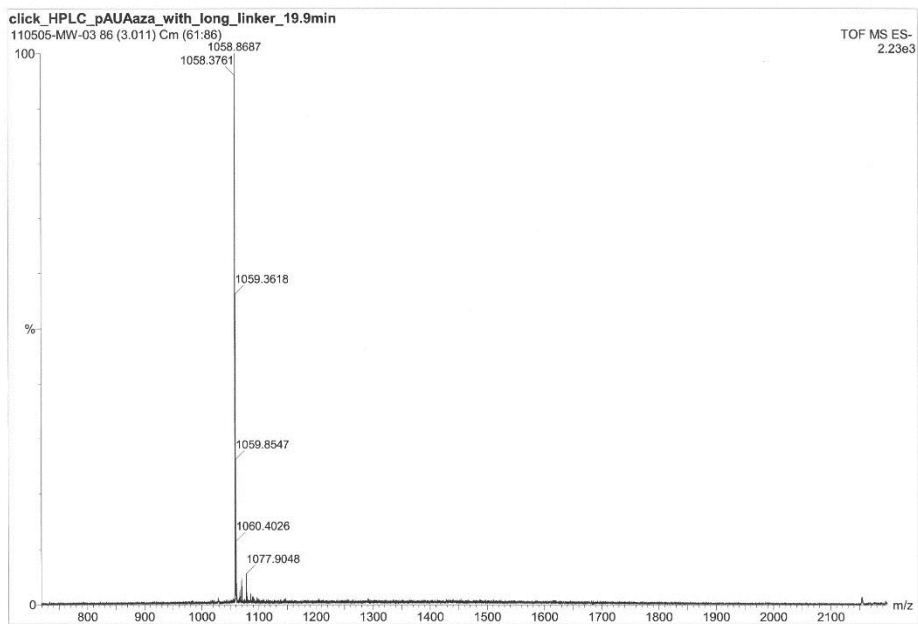

**j. Compound 23:**  $m_3$ GpppAOMeUOMeA-aza-LBL



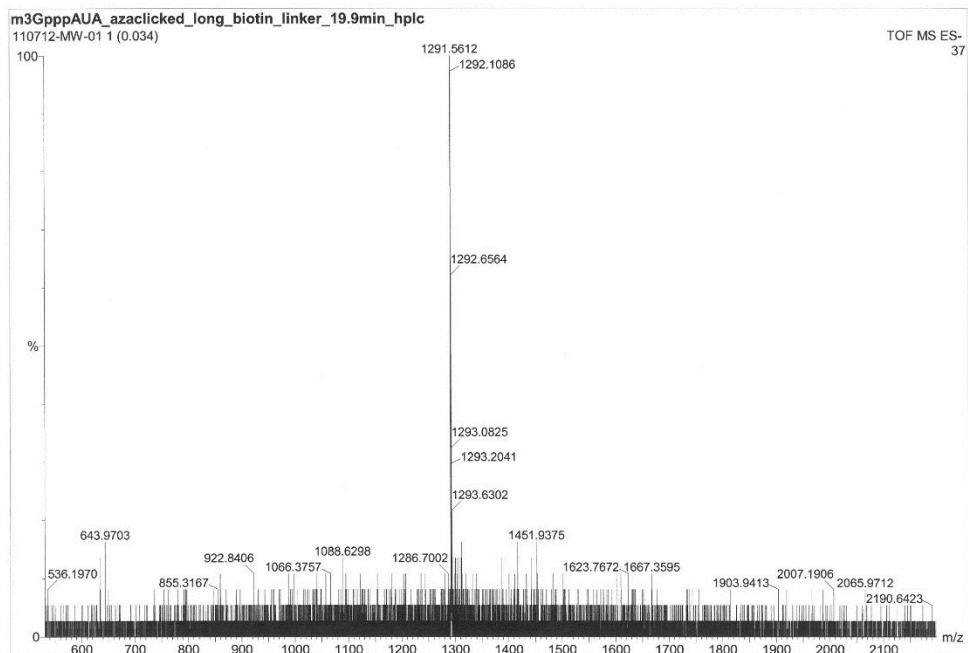

k. **Compound 24:**  $m_3GppCH_2pAOMeUOMeA-aza-LBL$

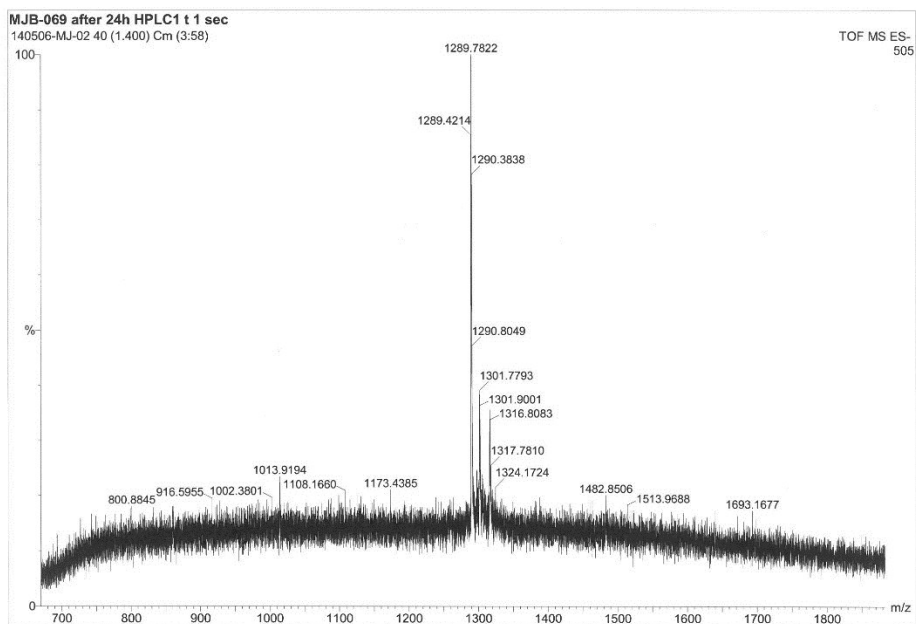

**I. Compound 25: pAOMeUOMeA-aza-PEGBL**

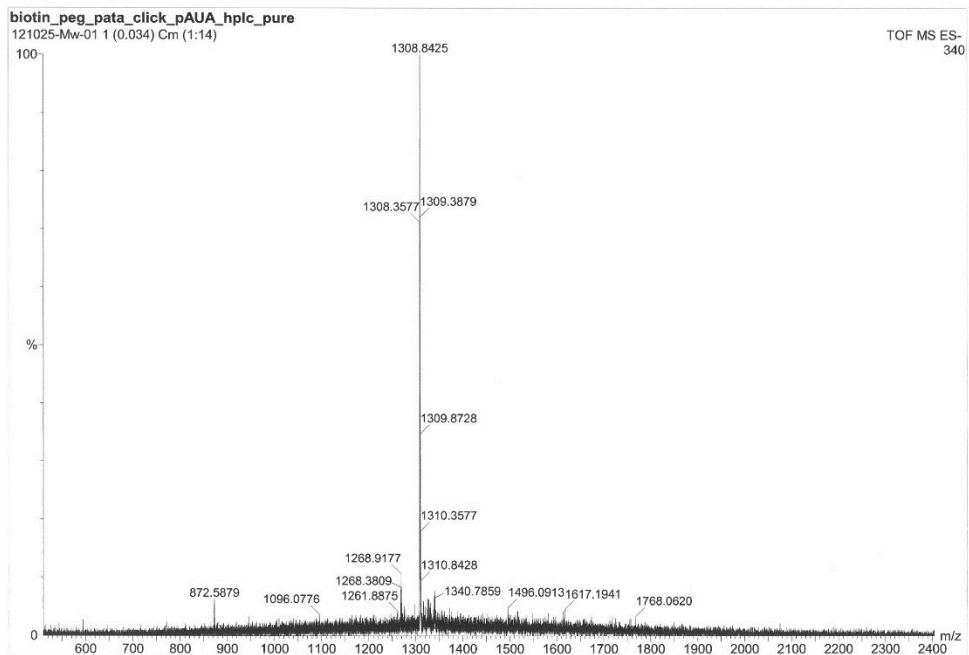

**m. Compound 26:**  $m_3$ GpppAOMeUOMeA-aza-PEGBL

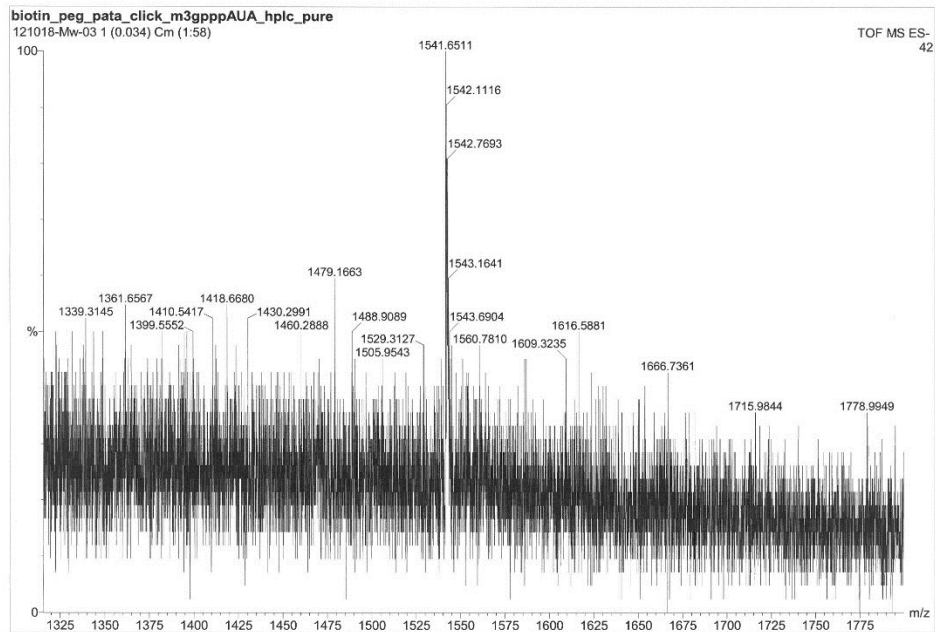

**S5. Fluorescence spectroscopy images of cells treated with m<sub>3</sub>G-CAP biotin construct complexes with STV-Alexa488 that did not display nuclear uptake.**

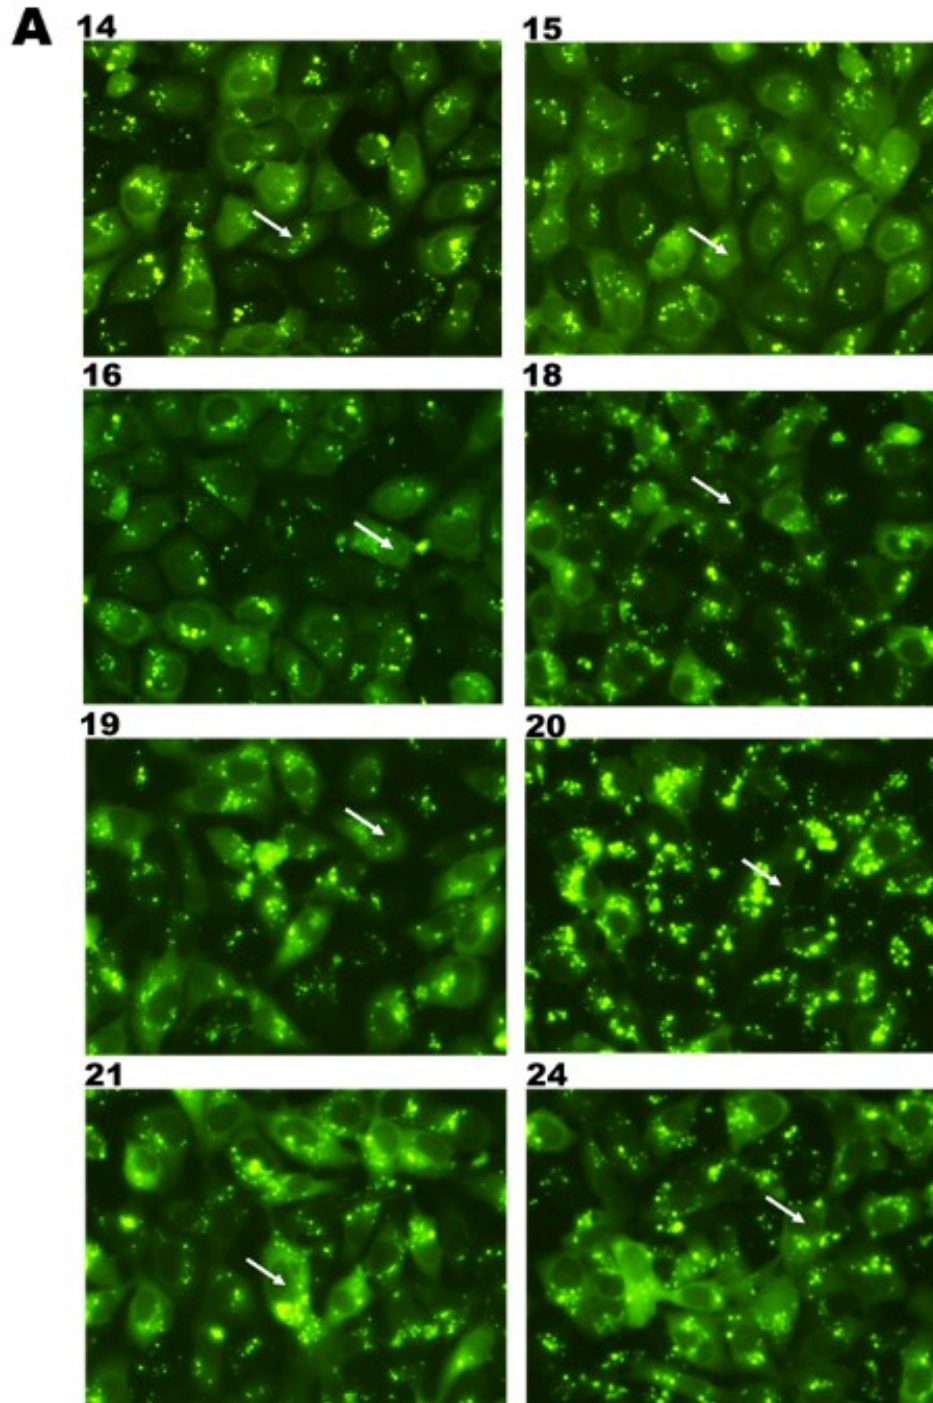

Fluorescence microscopy images of the cells treated with STV-Alexa488 complexes with constructs **14-15, 18-21** and **24**. Nuclear region of the cells are marked with a white arrow. Nuclear transport is evaluated by the Alexa-488 signal from the nucleus.

**S6. Enlargements of fluorescence spectroscopy images of U2OS cells transfected with STV-Alexa488 complexes of constructs 22 and 23.**

**23**

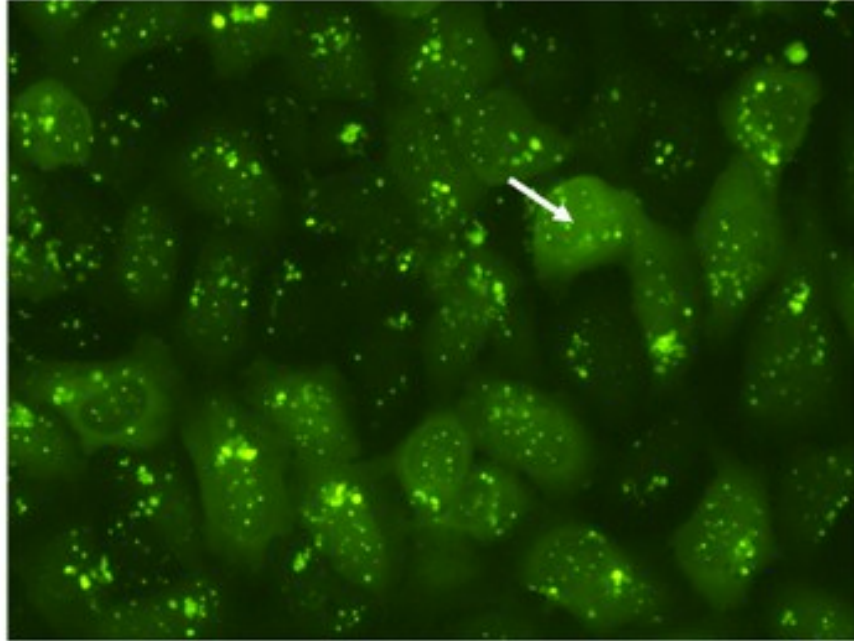

**22**

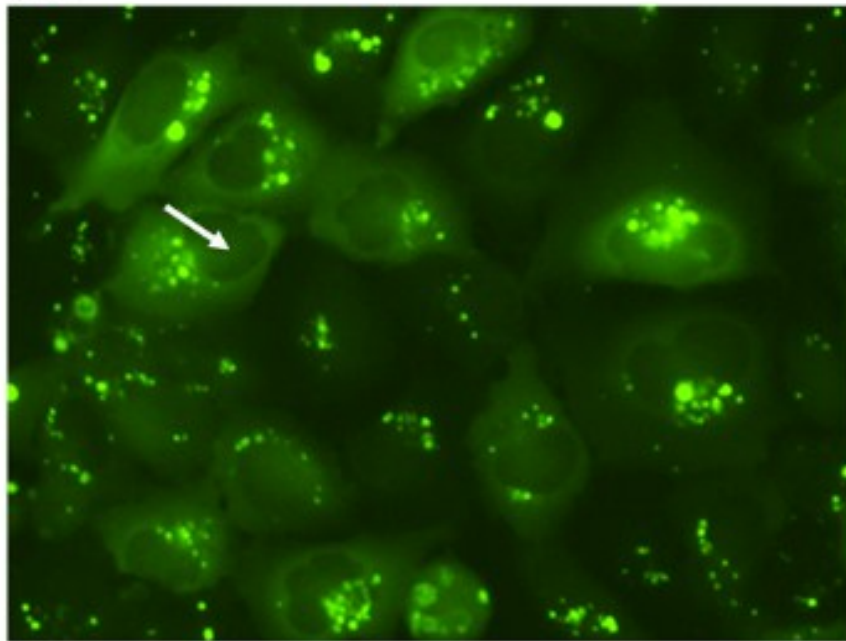

Fluorescence microscopy images of the cells treated with STV-Alexa488 complexes with constructs **22** and **23**. Nuclear region of the cells are marked with a white arrow. Nuclear transport is evaluated by the Alexa-488 signal from the nucleus.

**S7. Histogram of fluorescent signal intensities across cells transfected with STV-Alexa488 complex of construct 23.**

**23**

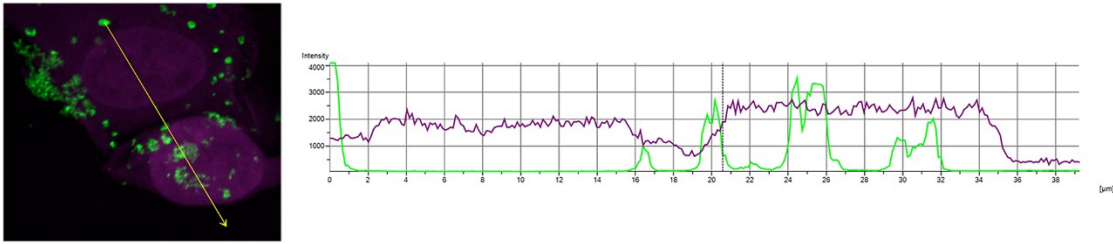

Confocal microscopy analysis of U2OS cells transfected with the complex of STV-Alexa488 with m3G-CAP construct **23**. Left panel shows the confocal image, whereas the right panel shows histograms that demonstrate fluorescent signal intensities along the indicated yellow line traversing the cells using NIS-Elements A1R software. In the histogram, x axis represents the length of the yellow line (left panel) and the y axis represents the signal intensity. For all images, contrast and brightness were changed for visualization purposes throughout the entire image. Purple lines represents **DRAQ5** nuclear stain and green represents Alexa488 signal.
